# Supplementary material
Source: Springer Nature journal article supplement (https://www.springermedizin.de/resource/supplementary/12916_2012_765_MOESM4_ESM.pdf/9598702)

### A MTT reduction

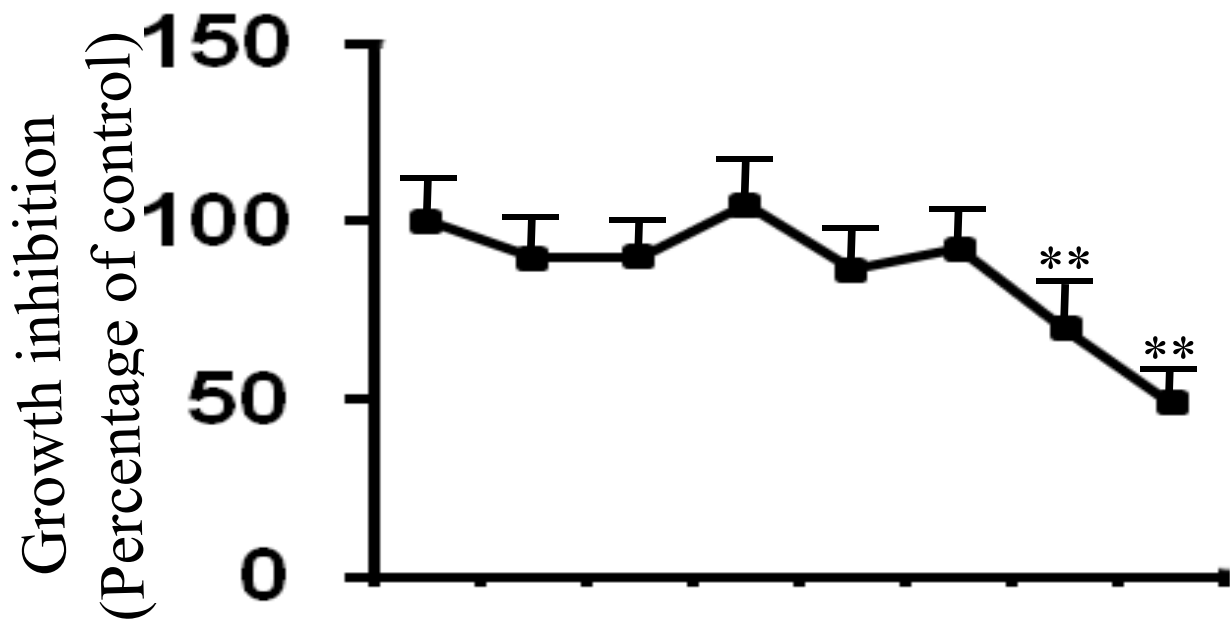

### B LDH release

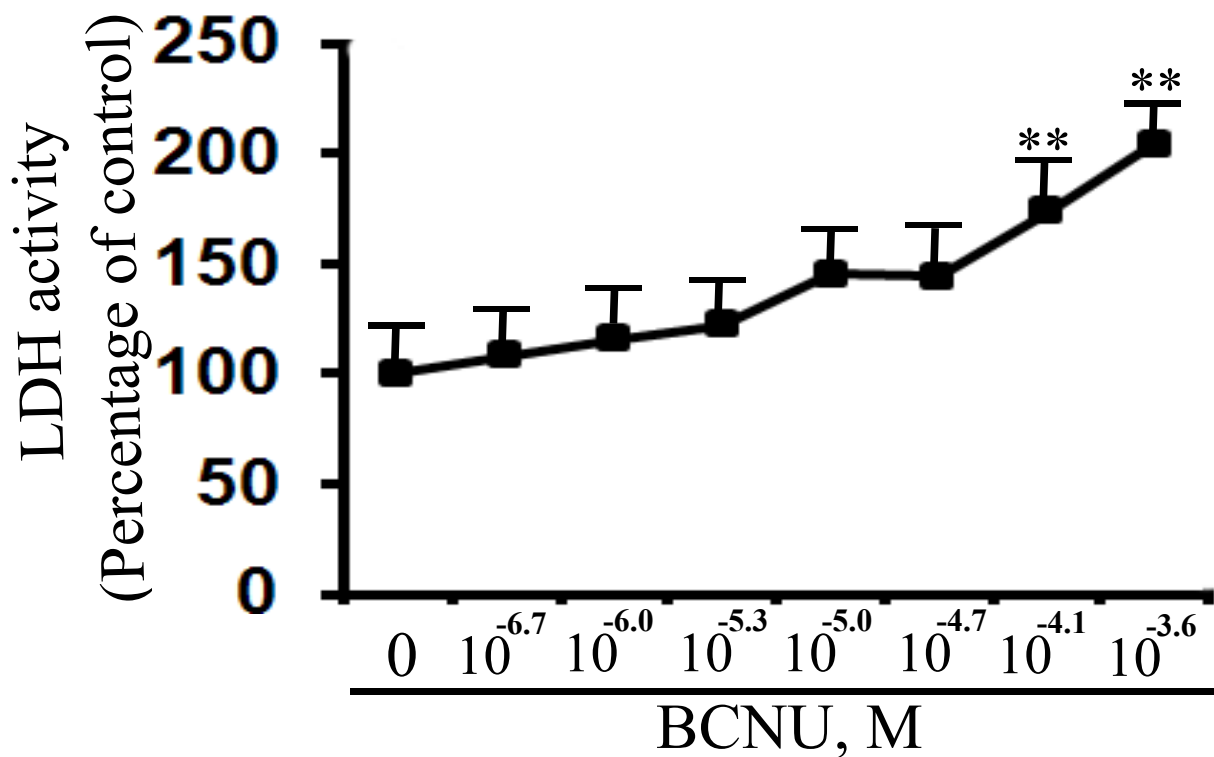

Supplement: MOESM4 [file 9598702]
